# Supplementary material
Source: PubMed Central journal article supplement (PMC4959247)
Supplement: AEM.00537-16_zam999117166so1.pdf [file AEM.00537-16_zam999117166so1.pdf]

# Supplemental material

**Type III-dependent translocation of HrpB2 by a non-pathogenic *hpaABC* mutant of the plant-pathogenic bacterium *Xanthomonas***

Felix Scheibner, Steve Schulz<sup>1</sup>, Jens Hausner, Sylvestre Marillonnet<sup>2</sup> and Daniela Büttner<sup>#</sup>

A

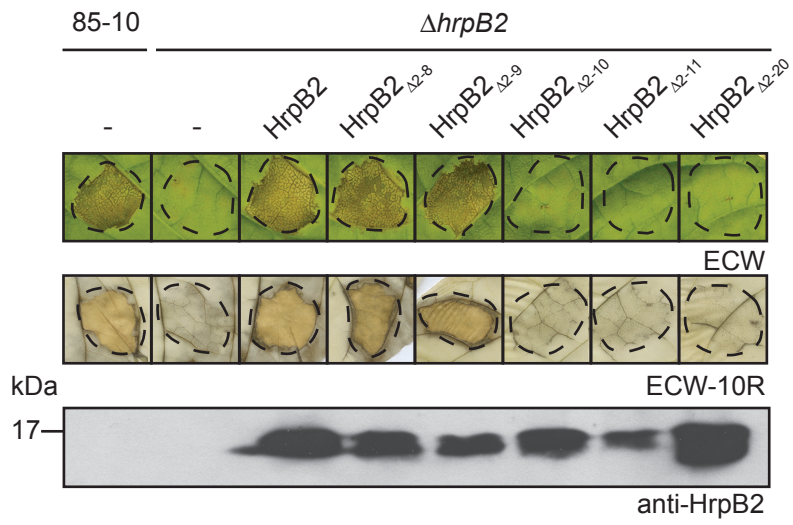

B

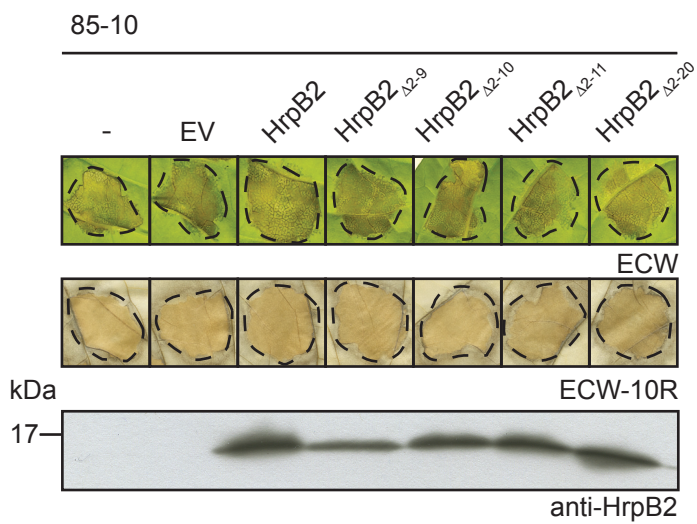

Figure S1  
Scheibner *et al.*

**Fig. S1** The N-terminal region of HrpB2 contributes to protein function.

(A) The N-terminal 10 amino acids of HrpB2 are essential for protein function. Strains 85-10 and 85-10 $\Delta$ *hrpB2* ( $\Delta$ *hrpB2*) without plasmid (-) or with expression constructs encoding HrpB2 or N-terminal deletion derivatives thereof as indicated were inoculated into leaves of susceptible ECW and resistant ECW-10R pepper plants. Disease symptoms were photographed 12 dpi. For the better visualization of the HR, infected leaves of ECW-10R plants were destained in ethanol 2 dpi. Dashed lines mark the infiltrated areas.

(B) HrpB2 derivatives do not exert a dominant-negative effect on pathogenicity of strain 85-10. Strain 85-10 with or without plasmid pBBRMCS-5 (EV, empty vector) or containing HrpB2 or HrpB2 derivatives as indicated was inoculated into leaves of susceptible ECW and resistant ECW-10R pepper plants. Disease symptoms were photographed 10 dpi. Leaves of ECW-10R pepper plants were destained in ethanol 2 dpi.

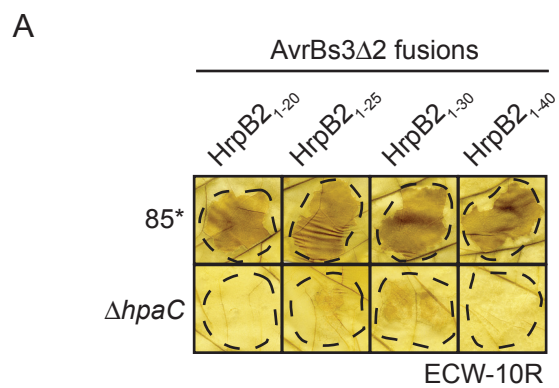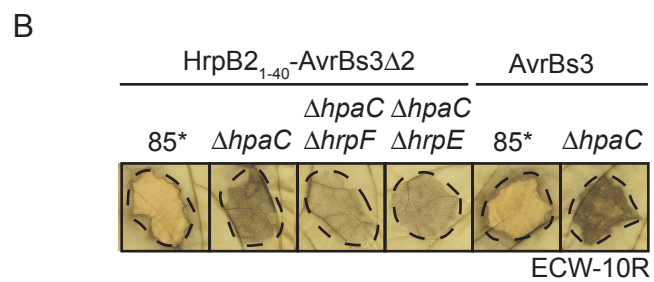

Figure S2  
Scheibner *et al.*

**Fig. S2** HR induction in AvrBs1-responsive pepper plants by *X. campestris* pv. *vesicatoria* strains containing HrpB2-AvrBs3 $\Delta$ 2 fusion proteins.

(A) HrpB2-AvrBs3 $\Delta$ 2 fusion proteins do not interfere with the interaction of *X. campestris* pv. *vesicatoria* with AvrBs1-responsive plants. Strains 85\* and 85\* $\Delta$ hpaC ( $\Delta$ hpaC) containing HrpB2-AvrBs3 $\Delta$ 2 fusion proteins as indicated were inoculated into leaves of AvrBs1-responsive ECW-10R pepper plants. Leaves were destained in ethanol 2 dpi.

(B) Infection assays with *X. campestris* pv. *vesicatoria* strains containing HrpB2<sub>1-40</sub>-AvrBs3 $\Delta$ 2 or AvrBs3. Strains 85\*, 85\* $\Delta$ hpaC ( $\Delta$ hpaC), 85\* $\Delta$ hpaC $\Delta$ hrpF ( $\Delta$ hpaC $\Delta$ hrpF) and 85\* $\Delta$ hpaC $\Delta$ hrpE ( $\Delta$ hpaC $\Delta$ hrpE) containing HrpB2<sub>1-40</sub>-AvrBs3 $\Delta$ 2, and 85\* and 85\* $\Delta$ hpaC delivering AvrBs3 were inoculated into leaves of ECW-10R pepper plants. Phenotypes were documented as described for panel A.

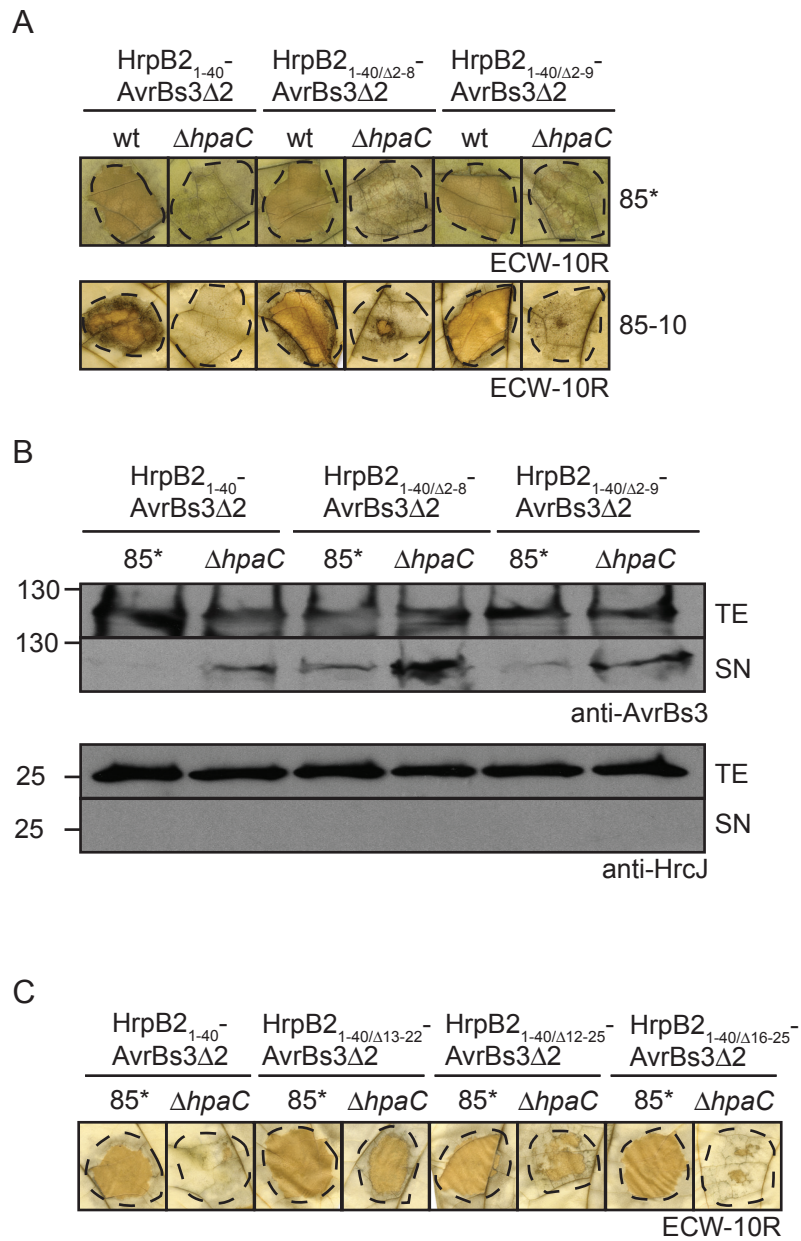

Figure S3  
Scheibner *et al.*

**Fig. S3** Analysis of HrpB2-AvrBs3 $\Delta$ 2 fusion proteins.

(A) Infection assays with *X. campestris* pv. *vesicatoria* wild-type and *hpaC* mutant strains containing HrpB2-AvrBs3 $\Delta$ 2 fusion proteins. Strains 85\* (wt), 85-10 (wt), 85\* $\Delta$ *hpaC* ( $\Delta$ *hpaC*) and 85-10 $\Delta$ *hpaC* ( $\Delta$ *hpaC*) containing HrpB2-AvrBs3 $\Delta$ 2 fusion proteins as indicated were inoculated into leaves of AvrBs1-responsive ECW-10R pepper plants. Leaves were destained in ethanol 2 dpi. Dashed lines mark the infiltrated areas.

(B) The N-terminal nine amino acids are dispensable for secretion of HrpB2<sub>1-40</sub>-AvrBs3 $\Delta$ 2. Strains 85\* and 85\* $\Delta$ *hpaC* ( $\Delta$ *hpaC*) containing HrpB2-AvrBs3 $\Delta$ 2 fusion proteins as indicated were incubated in secretion medium. Total cell extracts (TE) and culture supernatants (SN) were analysed by immunoblotting using antibodies specific for AvrBs3 and HrcJ, respectively.

(C) Infection assays with *X. campestris* pv. *vesicatoria* strains containing HrpB2-AvrBs3 $\Delta$ 2 fusion proteins. Strains 85\* and 85\* $\Delta$ *hpaC* ( $\Delta$ *hpaC*) containing HrpB2-AvrBs3 $\Delta$ 2 fusion proteins as indicated were inoculated into leaves of AvrBs1-responsive ECW-10R pepper plants. Leaves were destained in ethanol 2 dpi. Dashed lines mark the infiltrated areas.

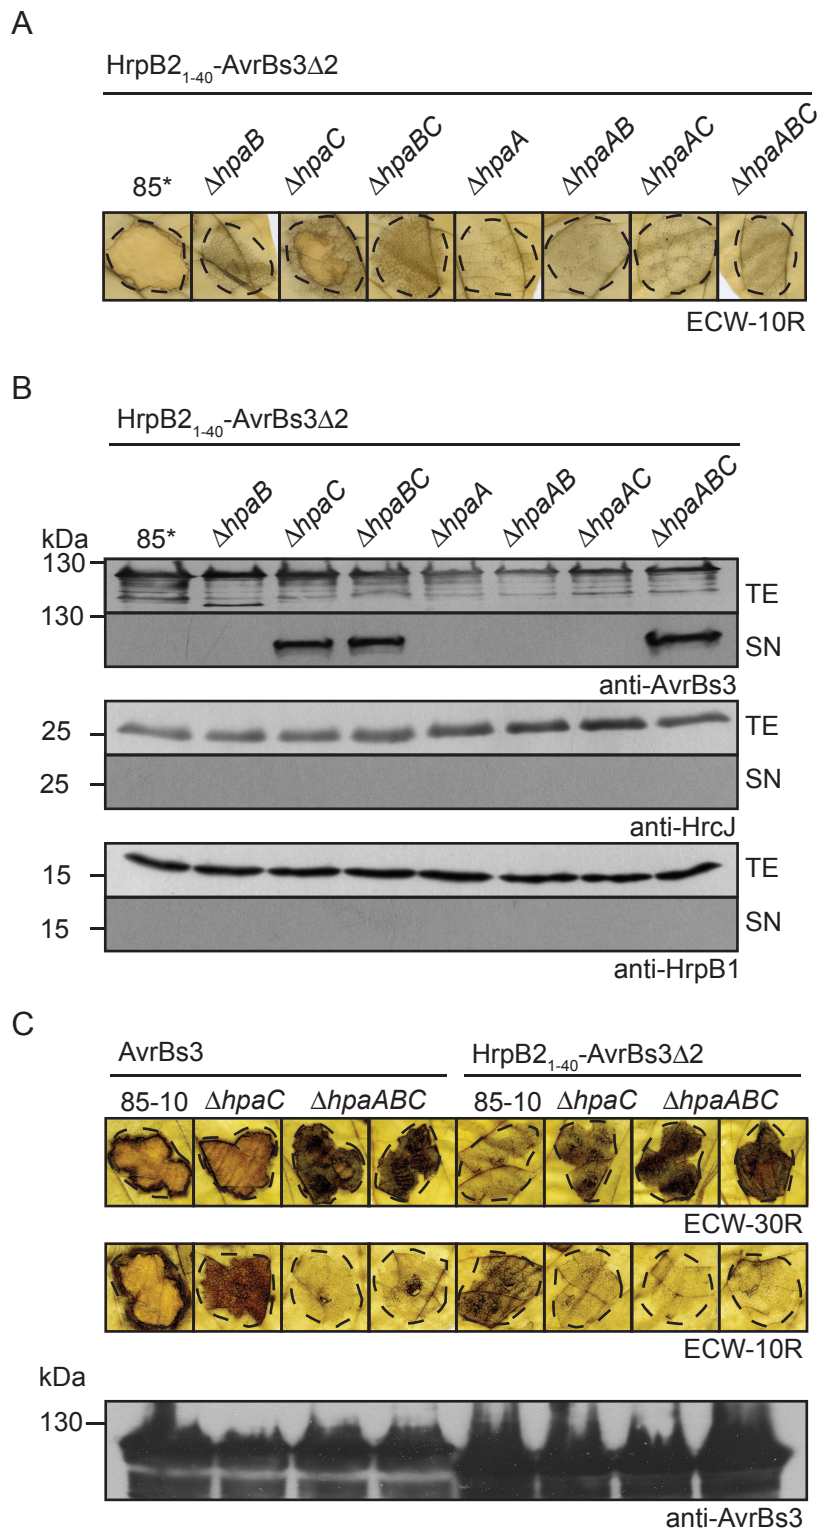

Figure S4  
Scheibner *et al.*



**Fig. S4** Analysis of HrpB2-AvrBs3 $\Delta$ 2 fusion proteins in double and triple *hpa* deletion mutants.

(A) Phenotypes of double and triple *hpa* deletion mutants containing HrpB2<sub>1-40</sub>-AvrBs3 $\Delta$ 2 in AvrBs1-responsive pepper plants. Strains 85\*, 85\* $\Delta$ *hpaB* ( $\Delta$ *hpaB*), 85\* $\Delta$ *hpaC* ( $\Delta$ *hpaC*), 85\* $\Delta$ *hpaBC* ( $\Delta$ *hpaBC*), 85\* $\Delta$ *hpaA* ( $\Delta$ *hpaA*), 85\* $\Delta$ *hpaAB* ( $\Delta$ *hpaAB*), 85\* $\Delta$ *hpaAC* ( $\Delta$ *hpaAC*) and 85\* $\Delta$ *hpaABC* ( $\Delta$ *hpaABC*) containing HrpB2<sub>1-40</sub>-AvrBs3 $\Delta$ 2 were inoculated into leaves of AvrBs1-responsive ECW-10R pepper plants. Leaves were destained in ethanol 2 dpi. Dashed lines mark the inoculated areas.

(B) HrpB2<sub>1-40</sub>-AvrBs3 $\Delta$ 2 is secreted by *hpaC*, *hpaBC* and *hpaABC* deletion mutants. *X. campestris* pv. *vesicatoria* strains as described in (A) were incubated in secretion medium. Total cell extracts (TE) and culture supernatants (SN) were analysed by immunoblotting using antibodies specific for AvrBs3, HrcJ and HrpB1, respectively.

(C) HR induction by AvrBs3 and HrpB2<sub>1-40</sub>-AvrBs3 $\Delta$ 2 is comparable when both proteins are delivered by strain 85-10 $\Delta$ *hpaABC*. Strains 85-10, 85-10 $\Delta$ *hpaC* ( $\Delta$ *hpaC*) and 85-10 $\Delta$ *hpaABC* ( $\Delta$ *hpaABC*) containing AvrBs3 or HrpB2<sub>1-40</sub>-AvrBs3 $\Delta$ 2 as indicated were inoculated at a bacterial density of  $8 \times 10^8$  CFU ml<sup>-1</sup> into leaves of AvrBs3-responsive ECW-30R and AvrBs1-responsive ECW-10R pepper plants. Leaves were destained 2 dpi (ECW-10R plants) and 4 dpi (ECW-30R plants).

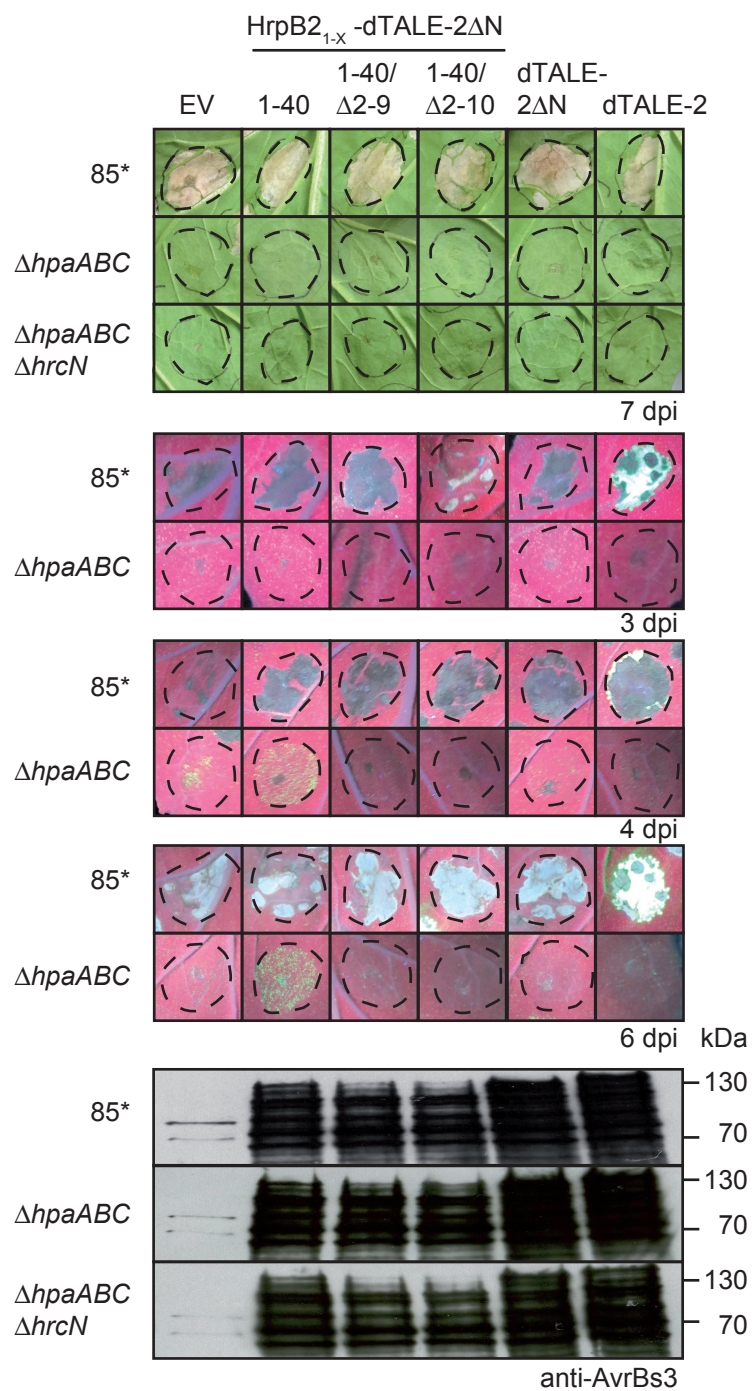

Figure S5  
Scheibner *et al.*

**Fig. S5** Analysis of dTALE-2 derivatives in *gfp*-transgenic *N. benthamiana* plants.

Strains 85\*, 85\* $\Delta hpaABC$  ( $\Delta hpaABC$ ) and 85\* $\Delta hpaABC\Delta hrcN$  ( $\Delta hpaABC\Delta hrcN$ ) containing the empty vector (EV), HrpB2<sub>1-40</sub>-dTALE-2 $\Delta$ N, HrpB2<sub>1-40/Δ2-9</sub>-dTALE-2 $\Delta$ N, HrpB2<sub>1-40/Δ2-10</sub>-dTALE-2 $\Delta$ N, dTALE-2 $\Delta$ N or dTALE-2 as indicated were inoculated at a density of  $8 \times 10^8$  CFU ml<sup>-1</sup> into leaves of *gfp*-transgenic *N. benthamiana* plants. Photographs of plant reactions were taken 7 dpi, photographs of GFP fluorescence 3, 4 and 6 dpi as indicated. Equal amounts of cell extracts (adjusted according to the cell density) were analysed by immunoblotting using AvrBs3-specific antibodies. The upper bands correspond to dTALE-2 and derivatives thereof, lower bands are degradation products.

### Sequences of dTALE2 constructs

DNA sequences of constructs encoding dTALE-2, dTALE-2 $\Delta$ N, HrpB2<sub>1-40</sub>-dTALE-2 $\Delta$ N, HrpB2<sub>1-40/ $\Delta$ 2-9</sub>-dTALE-2 $\Delta$ N and HrpB2<sub>1-40/ $\Delta$ 2-10</sub>-dTALE-2 $\Delta$ N. The *lac* promoter is shown in red, *hrpB2* sequences in green and dTALE-2 sequences in blue. DNA sequences were assembled from individual modules containing the *lac* promoter, *hrpB2* sequences and sequences encoding N-terminal, repeat and C-terminal regions of dTALE-2, respectively, using Golden Gate cloning. For the assembly of the construct encoding dTALE-2 $\Delta$ N, an oligonucleotide linker (shown in bold) encoding two lysine residues was inserted upstream of the dTALE-2 $\Delta$ N-encoding sequence.

**dTALE-2**

TGCCGCAGCTGGCACGACAGGTTTCCCGACTGGAAAGCGGGCAGTGAGCGCAACGCAATTAAT  
GTGAGTTAGCTCACTCATTAGGCACCCAGGCTTTACACTTTATGCTTCCGGCTCGTATGTTGTGT  
GGAATTGTGAGCGGATAACAATTGCAATAAGGATTTTTTAAATGGATCCGATTTCGTTCTCGGACAC  
CTTCTCCCGCTCGAGAGCTCCTTCTTGACCACAACCAGATGGAGTGCAACCAACAGCTGATAG  
GGGTGTATCTCCTCCAGCCGGTGGACCTCTTGACGGCTTACCTGCAAGGCGCACAAATGTCCCCT  
ACCAGATTGCCAGTCCACCAGCACCAAGTCCAGCGTTTTTCAGCGGGCAGCTTCTCTGACCTCC  
TGAGACAGTTTGATCCCTCTTTGTTCAACACCTCACTGTTTGACTCACTTCCGCCTTTTGGGGCTC  
ACCATACTGAAGCCGCTACTGGTGAGTGGGATGAGGTGCAGTCAGGCTTAAGAGCAGCTGATGC  
CCCACCACCTACGATGAGGGTGGCAGTAACTGCTGCTAGGCCACCGAGAGCTAAACCAGCTCCA  
AGACGCAGAGCAGCACAACTTCCGATGCATCTCCTGCTGCTCAAGTCGATCTTCGCACTTTAGG  
GTATAGCCAGCAACAACAGGAGAAGATCAAACCTAAGGTCCGAAGTACAGTTGCGCAACACCAT  
GAAGCCCTTGTTGGTCATGGGTTCACTCATGCCACATAGTTGCACTATCCCAACATCCTGCTGC  
TCTTGGAACTGTTGCGGTGAAGTACCAGGACATGATTGCTGCTTTACCTGAAGCAACACACGAGG  
CAATAGTCGGTGTGGCAAACAGTGGTCTGGCGCTAGGGCTCTAGAAGCCCTCCTTACAGTTGC  
AGGAGAATTGCGGGGACCTCCCTTGACGCTCGATACCGGACAATTGCTGAAGATTGCCAAACGT  
GGTGGTGTACGGCAGTAGAAGCAGTGCATGCTTGGAGGAATGCTCTAACTGGAGCACCCCTTGA  
ATCTCACGCCAGAACAAGTGGTCGCTATCGCCTCCCATGATGGTGGAAAACAAGCACTAGAAACT  
GTCCAAAGATTATTGCCTGTTCTTTGTCAGGCACACGGACTTACCCCAACAAGTCGTTGCTATA  
GCCTCCCATGATGGAGGGAAGCAAGCGTTAGAAACAGTGCAGCGGCTACTCCCTGTATTATGCC  
AGGCTCATGGTCTAACTCCACAACAAGTGGTGGCTATAGCCTCACACGATGGTGGTAAACAGGC  
ACTTGA AACCGTCCAAAGACTCCTGCCGGTCTCTGCCAGGCACACGGCCTCACCCCGAACAA  
GTGGTGGCTATTGCTTCGCATGATGGAGGTAAGCAGGCTTTAGAGACAGTCCAGAGACTACTAC  
CCGTTCTATGCCAGGCCCATGGTTTGACCCCGAACAGGTTGTTGCTATTGCGTCAAATAAGGGC  
GGCAAGCAAGCGTTGGAAACCGTTCAAGCATTACTCCCTGTTCTGTCAAGCACATGGGCTAAC  
GCCCCGAGCAGGTTGTTGCAATTGCATCACATGATGGAGGAAAGCAGGCCTTAGAAACGGTACAG  
GCACTTTTACCAGTCTTTGCCAAGCACACGGGCTTACACCCGAACAAGTGGTCGCTATTGCAAG  
TAATATAGGTGAAAAACAAGCACTGGA AACCGTGCAGGCGCTTTTGCCGGTATTATGCCAAGCTC  
ACGGCCTAACTCCTGAACAGGTGGTTGCGATTGCCTCAAATGGTGGGGTAAACAGGCAGCTGGA  
GACTGTGCAGCGGCTTTTGCCTGTTTTGTGTCAAGCTCATGGATTGACACCAGAGCAGGTTGCTC  
GCTATAGCTAGTAACATTGGAGGTAACAAGCGCTTGA AACCGTGCAACGTCTGCTGCCAGTTCT  
ATGTCAAGCTCATGGGTTGACCCCAACAAGGTTGTAGCGATCGTTCCAATAAAGGAGGAAAGC  
AAGCTCTAGAAACGGTGCAGAGGCTCCTCCCGGTTCTTTGTCAGGCGCATGGATTGACCCCGGA  
GCAGGTGGTGC AATCGCCAGTCATGATGGAGGTAAGCAGGCCTTGGAAACCGTTCAGGCGTTA  
CTCCCGGTTCTATGCCAGGCGCATGGCCTGACCCCTGAACAGGTTGTGGCGATAGCCAGTAACG  
GCGGGGGAAAGCAGGCACTTGA AACCGTACAACGACTCCTCCAGTCTTTGTCAAGCCACGG  
ATTGACTCCAGAACAAGTAGTTGCTATAGCTTCAATAAGGGAGGAAAGCAGGCCCTTGA AACAG  
TTCAGCGTCTTTTGCCAGTGTGTGTCAAGCACACGGATTGACTCCTGAACAGGTTGTCGCCATT  
GCATCTAATATCGGTGGTAAGCAAGCTCTCGAAACCGTACAGCGACTCTTGCTGTTCTATGCCA  
AGCGCATGGCTTGACGCCGAACAGGTGGTAGCCATAGCAAGCAACATAGGTGGCAAACAAGCT  
CTTGA AACAGTTCAAAGGTTGTTACCTGTGCTTTGCCAAGCCACGTTTTGACCCCTCAACAGGT  
GGTTGCTATAGCATCACATGATGGGGGACGGCCTGCTCTTGAGACAGTGCAGCGCCTGTTGCC  
GTGTTGTGTCAAGCGCATGGCTTAACACCGGAACAGGTCTGGCAATTGCGTCAAATATTGGCG  
GCAAACAAGCGCTGGAAACCGTTCAGCGACTCTTGCTGTTCTGTGCCAAGCTCACGGTCTGAC  
GCCCAACAGGTTGTTGCCATTGCTTCAAATGGAGGAGGGAGGCCAGCCCTTGAGTCGATTGTC  
GCACAGCTATCTCGGCCCGACCCTGCTTTAGCCGCTCTGACAAATGATCATCTTGTGGCTCTCGC  
CTGCTTAGGAGGTCGCCAGCTTTAGACGCAGTAAAAAGGGTCTACCTCATGCTCCGGCCTTAA  
TCAAGAGGACGAATCGTAGAATCCAGAACGAACGAGCCATCGCGTAGCCGATCACGCTCAAGT  
TGTTAGGGTTTTAGGTTTTTTTTCAGTGTCAATTCACATCCGGCACAAAGCTTTTCGATGATGCCATGAC  
CCAGTTTGGTATGTCAAGGCATGGATTACTGCAACTTTTCAGAAGAGTAGGAGTGACAGAGCTCG  
AAGCCAGAAGCGAACTCTGCCACCCGCTAGCCAAAGATGGGATAGGATATTGCAGGCGAGTGG  
AATGAAGCGCGGAACCATCTCCAACAAGCACTCAAACCCCGGATCAAGCGAGTTTTCACGCT  
TTCGCAAGATTCTCTCGAACGAGATTTGGATGCCCTTCTCCAATGCACGAAGGTGATCAAAC TAG  
GGCGAGTAGCAGGAAGAGGTCTAGGAGTGATCGTGCAGTTACGGGCCCTCAGCACAACAGTCT  
TTTGAGGTCAGGGTGCCAGAACAAGGGACGCTTTACATCTCCCATTTGCTTGGCGTGTA AAAAG  
GCCGCGA ACTAGTATTGGAGGGGATTACCGGACCCAGGGACCCCACTGCTGCTGATCTAGCT  
GCTTCTAGTACGGTAATGCGCGAGCAAGACGAGGATCCATTTGCTGGGGCAGCTGATGACTTCC  
CCGCATTCAACGAAGAAGAATTAGCATGGTTGATGGAGTTACTGCCACAGTAAGCGCTTACTAGC  
TTTTAAGCCAGCCCGACACCCGCCAACACCCGCTGACGCGCCCTGACGGGCTTGTCTGCTCCC  
GGCATCCGCTTACAGACAAGCTGTGACCGGGA

dTALE-2ΔN

TGCCGCAGCTGGCACGACAGGTTTCCCGACTGGAAAGCGGGCAGTGAGCGCAACGCAATTAAT  
GTGAGTTAGCTCACTCATTAGGCACCCAGGCTTTACACTTTATGCTTCCGGCTCGTATGTTGTGT  
GGAATTGTGAGCGGATAACAATTGCAATAAGGATTTTTTAAATGAAAAATCAGCGGGCAGCTTC  
TCTGACCTCCTGAGACAGTTTGTATCCCTCTTTGTTCAACACCTCACTGTTTGACTCACTTCCGCCT  
TTTGGGGCTCACCATACTGAAGCCGCTACTGGTGAGTGGGATGAGGTGCAGTCAGGCTTAAGAG  
CAGCTGATGCCCCACCACCTACGATGAGGGTGGCAGTAACCTGCTGCTAGGCCACCGAGAGCTAA  
ACCAGCTCCAAGACGCAGAGCAGCACAACTTCCGATGCATCTCCTGCTGCTCAAGTCGATCTTC  
GCACTTTAGGGTATAGCCAGCAACAACAGGAGAAGATCAAACCTAAGGTCCGAAGTACAGTTGC  
GCAACACCATGAAGCCCTTGTGGTTCATGGGTTCACTCATGCCACATAGTTGCACTATCCCAAC  
ATCCTGCTGCTCTTGGAACTGTTGCGGTGAAGTACCAGGACATGATTGCTGCTTTACCTGAAGCA  
ACACACGAGGCAATAGTCGGTGTGGCAAACAGTGGTCTGGCGCTAGGGCTCTAGAAGCCCTCC  
TTACAGTTGCAGGAGAATTGCGGGGACCTCCCTTGCAGCTCGATACCGGACAATTGCTGAAGATT  
GCCAAACGTGGTGGTGTACGGCAGTAGAAGCAGTGCATGCTTGGAGGAATGCTCTAACTGGAG  
CACCTTGAATCTCACGCCAGAACAAGTGGTCGCTATCGCCTCCCATGATGGTGGAAAACAAGCA  
CTAGAACTGTCCAAGATTATTGCCTGTTCTTTGTGAGGCACACGGACTTACCCCAACAAGTC  
GTTGCTATAGCCTCCCATGATGGAGGGAAGCAAGCGTTAGAAACAGTGCAGCGGCTACTCCCTG  
TATTATGCCAGGCTCATGGTCTAACTCCACAACAAGTGGTGGCTATAGCCTCACACGATGGTGGT  
AAACAGGCACTTGAACCGTCCAAGACTCCTGCCGGTCTCTGCCAGGCACACGGCCTCACCC  
CCGAACAAGTGGTGGCTATTGCTTCGCATGATGGAGGTAAGCAGGCTTTAGAGACAGTCCAGAG  
ACTACTACCGTTCATGCCAGGCCCATGGTTTGACCCCGGAACAGGTTGTTGCTATTGCGTCAA  
ATAAGGGCGGCAAGCAAGCGTTGAAACCGTCAAGCATTACTCCCTGTTCTGTCAAGCACAT  
GGGCTAACGCCCGAGCAGGTTGTTGCAATTGCATCACATGATGGAGGAAAGCAGGCCTTAGAAA  
CGGTACAGGCACTTTTACCAGTCTTTGCCAAGCACACGGGCTTACACCCGAACAAGTGGTCCG  
TATTGCAAGTAATATAGGTGGAAAACAAGCACTGGAAACCGTGCAGGCGCTTTTGCCGGTATTAT  
GCCAAGCTCACGGCCTAACTCCTGAACAGGTGGTTGCGATTGCCTCAAATGGTGGGGGTAACA  
GGCACTGGAGACTGTGCAGCGGCTTTTGCCTGTTTTGTGTCAAGCTCATGGATTGACACCAGAG  
CAGGTGGTTCGCTATAGCTAGTAACATTGGAGGTAACAAGCGCTTGAACCGTGCACAGTCTGCT  
GCCAGTTCTATGTCAAGCTCATGGTTGACCCCAACAAGGTTGTAGCAGTCCGTTCCAATAAAG  
GAGGAAAGCAAGCTTAGAAACGGTGCAGAGGCTCCTCCCGTCTTTGTCAGGCGCATGGATT  
GACCCCGGAGCAGGTGGTTCGCAATCGCCAGTCATGATGGAGGTAAGCAGGCCTTGAAACCGT  
TCAGGCGTTACTCCCGTTCATGCCAGGCGCATGGCCTGACCCCTGAACAGGTTGTGGCGATA  
GCCAGTAACGGCGGGGAAAGCAGGCACTTGAACCGTACAACGACTCCTCCAGTCTTTGTG  
AAGCCACGGATTGACTCCAGAACAAGTAGTTGCTATAGCTTCGAATAAGGGAGGAAAGCAGGC  
CCTTGAACAGTTCAGCGTCTTTTGCCAGTGTGTGTCAAGCACACGGATTGACTCCTGAACAGG  
TTGTGCGCATTGCATCTAATATCGGTGGTAAGCAAGCTCTCGAAACCGTACAGCGACTCTTGCT  
GTTCTATGCCAAGCGCATGGCTTGACGCCGGAACAGGTGGTAGCCATAGCAAGCAACATAGGTG  
GCAACAAGCTCTTGAACAGTTCAAAGGTTGTTACCTGTGCTTTGCCAAGCCCACGGTTTGACC  
CCTCAACAGGTGGTTGCTATAGCATCACATGATGGGGGACGGCCTGCTCTTGAGACAGTGCAGC  
GCCTGTTGCCCGTGTGTGTCAAGCGCATGGCTTAACACCGGAACAGGTCGTGGCAATTGCGTC  
AAATATTGGCGGCAACAAGCGCTGGAAACCGTTCAGCGACTCTTGCTGTTCTGTGCCAAGCTC  
ACGGTCTGACGCCCAACAGGTTGTTGCCATTGCTTCAAATGGAGGAGGGAGGCCAGCCCTTGA  
GTCCGATTGTGCGACAGCTATCTCGGCCGACCCTGCTTTAGCCGCTCTGACAAATGATCATCTTG  
TGGCTCTCGCCTGCTTAGGAGGTGCGCCAGCTTTAGACGCAGTAAAAAGGGTCTACCTCATGCT  
CCGGCCTTAATCAAGAGGACGAATCGTAGAATCCGAGAACGAACGAGCCATCGCGTAGCCGATC  
ACGCTCAAGTTGTTAGGGTTTTAGGTTTTTTTCAAGTGTCAATTCACATCCGGCACAAGCTTTGATG  
ATGCCATGACCCAGTTTGGTATGTCAAGGCATGGATTACTGCAACTTTTTCAGAAGAGTAGGAGTG  
ACAGAGCTCGAAGCCAGAAGCGGAACTCTGCCACCCGCTAGCCAAAGATGGGATAGGATATTGC  
AGGCGAGTGGAATGAAGCGCGCGAAACCATCTCCAACAAGCACTCAAACCCCGGATCAAGCGAG  
TTTGCACGCTTTCGCAGATTCTCTGAACGAGATTTGGATGCCCTTCTCCAATGCACGAAGGTG  
ATCAAACCTAGGGCAGTAGCAGGAAGAGGTCTAGGAGTGATCGTGCAGTTACGGGCCCCCTCAGC  
ACAACAGTCTTTTGGAGTCAAGGTGCCAGAACAAAGGGACGCTTTACATCTCCCATTTGCTTGGC  
GTGTA AAAAGGCCGCGAACTAGTATTGGAGGGGATTACCGGACCCAGGACCCCACTGGC  
CTGATCTAGCTGCTTCTAGTACGGTAATGCGCGAGCAAGACGAGGATCCATTTGCTGGGGCAGC  
TGATGACTTCCCGCATTCAACGAAGAAGAATTAGCATGGTTGATGGAGTTACTGCCACAGTAAG  
CGCTTACTAGCTTTTAAAGCCAGCCCCGACACCCGCCAACACCCGCTGACGCGCCCTGACGGGCT  
TGCTGCTCCCGCATCCGCTTACAGACAAGCTGTGACCGGGA

**HrpB2<sub>1-40</sub>-dTALE-2ΔN**

TGCCGCAGCTGGCACGACAGGTTTCCCGACTGGAAAGCGGGCAGTGAGCGCAACGCAATTAAT  
GTGAGTTAGCTCACTCATTAGGCACCCAGGCTTTACACTTTATGCTTCCGGCTCGTATGTTGTGT  
GGAATTGTGAGCGGATAACAATTGCAATAAGGATTTTTTAAATGACGCTCATTCTCTGTCCAAG  
CGATTGCCGGCACCAGTGCTGCCGCGACCCAAGCGCTGTGCGCCGGTGGAACGCCCAACCAAG  
CGCTGGTGAATCGCTTTCAAGCGCTGATGCAATCAGCGGGCAGCTTCTCTGACCTCCTGAGACA  
GTTTGATCCCTCTTTGTTCAACACCTCACTGTTTGACTCACTTCCGCCTTTTGGGGCTCACCATAC  
TGAAGCCGCTACTGGTGAGTGGGATGAGGTGCAGTCAGGCTTAAGAGCAGCTGATGCCCCACCA  
CCTACGATGAGGGTGGCAGTAACTGCTGCTAGGCCACCGAGAGCTAAACCAGCTCCAAGACGCA  
GAGCAGCACAACCTTCCGATGCATCTCCTGCTGCTCAAGTCGATCTTCCGACTTTAGGGTATAGC  
CAGCAACAACAGGAGAAGATCAAACCTAAGGTCCGAAGTACAGTTGCGCAACACCATGAAGCCC  
TTGTTGGTCAATGGGTTCACTCATGCCACATAGTTGCACTATCCCAACATCCTGCTGCTCTTGGAA  
CTGTTGCGGTGAAGTACCAGGACATGATTGCTGCTTTACCTGAAGCAACACACGAGGCAATAGTC  
GGTGTGGCAAACAGTGGTCTGGCGCTAGGGCTCTAGAAGCCCTCCTTACAGTTGCAGGAGAAT  
TGCGGGGACCTCCCTTGCAGCTCGATACCGGACAATTGCTGAAGATTGCCAAACGTGGTGGTGT  
TACGGCAGTAGAAGCAGTGCATGCTTGGAGGAATGCTCTAACTGGAGCACCCCTTGAATCTCACG  
CCAGAACAAGTGGTCGCTATCGCCTCCCATGATGGTGGAAAACAAGCACTAGAAACTGTCCAAG  
ATTATTGCCTGTTCTTTGTCAGGCACACGGACTTACCCACAACAAGTCGTTGCTATAGCCTCCCA  
TGATGGAGGGAAGCAAGCGTTAGAAACAGTGCAGCGGCTACTCCCTGTATTATGCCAGGCTCAT  
GGTCTAACTCCACAACAAGTGGTGGCTATAGCCTCACACGATGGTGGTAAACAGGCACTTGA AAC  
CGTCCAAGACTCCTGCCGGTCCCTGCCAGGCACACGGCCTCACCCCGAACAAAGTGGTGGCT  
ATTGCTTCGCATGATGGAGGTAAGCAGGCTTTAGAGACAGTCCAGAGACTACTACCCGTTCTATG  
CCAGGCCCATGGTTTGACCCCGGAACAGGTTGTTGCTATTGCGTCAAATAAGGGCGGCAAGCAA  
GCGTTGGAAACCGTTCAAGCATTACTCCCTGTTCTCTGTCAAGCACATGGGCTAACGCCCGAGCA  
GGTTGTTGCAATTGCATCACATGATGGAGGAAAGCAGGCCTTAGAAACGGTACAGGCACTTTTAC  
CAGTCCCTTTGCCAAGCACACGGGCTTACACCCGAACAAGTGGTCGCTATTGCAAGTAATATAGGT  
GGAAAACAAGCACTGGAAACCGTGCAGGCGCTTTTGCCGGTATTATGCCAAGCTCACGGCCTAA  
CTCCTGAACAGTGGTTGCGATTGCCTCAAATGGTGGGGTAAACAGGCACTGGAGACTGTGCA  
GCGGCTTTTGCCTGTTTTGTGTC AAGCTCATGATTGACACCAAGCAGTGGTGGCTATAGCTA  
GTAACATTTGAGGTAACAAGCGCTTGAACCGTGAACCGTGCACGCTCTGCTGCCAGTTCTATGTCAAGCT  
CATGGGTTGACCCACAACAGGTTGTAGCGATCGCTTCCAATAAAGGAGGAAAGCAAGCTCTAG  
AAACGGTGCAGAGGCTCCTCCCGGTTCTTTGTCAGGCGCATGGATTGACCCCGGAGCAGGTGGT  
CGCAATCGCCAGTCATGATGGAGGTAAGCAGGCCTTGAAACCGTTCAGGCGTTACTCCCGGTT  
CTATGCCAGGCGCATGGCCTGACCCCTGAACAGGTTGTGGCGATAGCCAGTAACGGCGGGGGA  
AAGCAGGCACTTGAACCGTACAACGACTCCTCCAGTCCTTTGTCAAGCCACGGATTGACTCC  
AGAACAAGTAGTTGCTATAGCTTCGAATAAGGGAGGAAAGCAGGCCCTTGAACAGTTCAGCGTC  
TTTTGCCAGTGTGTCAAGCACACGGATTGACTCCTGAACAGGTTGTGCGCATTGCATCTAATA  
TCGGTGGTAAGCAAGCTCTCGAAACCGTACAGCGACTCTTGCTGTTCTATGCCAAGCGCATGG  
CTTGACGCCGGAACAGGTGGTAGCCATAGCAAGCAACATAGGTGGCAAACAAGCTCTTGAACA  
GTTCAAAGGTTGTTACCTGTGCTTTGCCAAGCCACGGTTTGAACCCCTCAACAGGTGGTTGCTAT  
AGCATCACATGATGGGGACGGCCTGCTCTTGAGACAGTGCAGCGCCTGTTGCCCGTGTGTGT  
CAAGCGCATGGCTTAACACCGGAACAGGTGCTGGCAATTGCGTCAAATATTGGCGGCAAACAAG  
CGCTGGAACCGTTCAGCGACTCTTGCTGTTCTGTGCCAAGCTCACGGTCTGACGCCCAACA  
GGTTGTTGCCATTGCTTCAAATGGAGGAGGGAGGCCAGCCCTTGAGTCGATTGTGCGCACAGCTA  
TCTCGGCCCGACCCTGCTTTAGCCGCTCTGACAAATGATCATCTTGTGGCTCTCGCCTGCTTAGG  
AGGTGCCCCAGCTTTAGACGCAGTAAAAAGGGTCTACCTCATGCTCCGGCCTTAATCAAGAGGA  
CGAATCGTAGAATCCAGAACGAACGAGCCATCGCGTAGCCGATCACGCTCAAGTTGTTAGGGT  
TTTAGGTTTTTTTCAAGTGTCAATCACATCCGGCACAAGCTTTTCGATGATGCCATGACCCAGTTTGG  
TATGTCAAGGCATGGATTACTGCAACTTTTTCAGAAGAGTAGGAGTGACAGAGCTCGAAGCCAGAA  
GCGGAACTCTGCCACCCGCTAGCCAAAGATGGGATAGGATATTGCAGGCGAGTGGAATGAAGCG  
CGCGAAACCATCTCCAACAAGCACTCAAACCCCGGATCAAGCGAGTTTGCACGCTTTTCGAGATT  
CTCTGAACGAGATTGGATGCCCTTCTCCAATGCACGAAGTGATCAAACACTAGGGCGAGTAG  
CAGGAAGAGGTTAGGAGTGATCGTGTACTTACGGGCCCTCAGCACAACAGTCTTTTGGAGTGC  
AGGGTGCCAGAACAAAGGGACGCTTTACATCTCCATTGTCTTGGCGTGTAAAAAGGCCGCGAA  
CTAGTATTGGAGGGGATTACCGGACCCAGGGACCCCACTGCTGCTGATCTAGCTGCTTCTAG  
TACGGTAATGCGCGAGCAAGACGAGGATCCATTTGCTGGGGCAGCTGATGACTTCCCCGCATT  
AACGAAGAAGAATTAGCATGGTTGATGGAGTTACTGCCACAGTAA GCGCTTACTAGCTTTTAAAGC  
CAGCCCCGACACCCGCCAACACCCGCTGACGCGCCCTGACGGGC

**HrpB2<sub>1-40/Δ2-9</sub>-dTALE-2ΔN**

TGCCGCAGCTGGCACGACAGGTTTCCCGACTGGAAAGCGGGCAGTGAGCGCAACGCAATTAAT  
GTGAGTTAGCTCACTCATTAGGCACCCAGGCTTTACACTTTATGCTTCCGGCTCGTATGTTGTGT  
GGAATTGTGAGCGGATAACAATTGCAATAAGGATTTTTTAAATGATTGCCGGCACCAAGTGCTGCC  
GCGACCCAAGCGCTGTTCGCCGGTGGCAACGCCCAACCAAGCGCTGGTGAATCGCTTTCAAGCG  
CTGATGCAATCAGCGGGCAGCTTCTCTGACCTCTGAGACAGTTTGATCCCTCTTTGTTCAACAC  
CTCACTGTTTGACTCACTTCCGCCTTTTGGGGCTCACCATACTGAAGCCGCTACTGGTGAGTGGG  
ATGAGGTGCAGTCAGGCTTAAGAGCAGCTGATGCCCCACCACCTACGATGAGGGTGCCAGTAAC  
TGCTGCTAGGCCACCGAGAGCTAAACCAGCTCCAAGACGCAGAGCAGCACAACCTTCCGATGCA  
TCTCCTGCTGCTCAAGTCGATCTTCGCACCTTTAGGGTATAGCCAGCAACAACAGGAGAAGATCAA  
ACCTAAGGTCCGAAGTACAGTTGCGCAACACCATGAAGCCCTTGTTGGTCATGGGTTCACTCATG  
CCCACATAGTTGCACTATCCCAACATCCTGCTGCTCTTGGAACTGTTGCGGTGAAGTACCAGGAC  
ATGATTGCTGCTTTACCTGAAGCAACACACGAGGCAATAGTCGGTGTGGCAACAGTGGTCTGG  
CGCTAGGGCTCTAGAAGCCCTCCTTACAGTTGCAGGAGAATTGCGGGGACCTCCCTTGCAGCTC  
GATACCGGACAATTGCTGAAGATTGCCAACGTGGTGGTGTACGGCAGTAGAAGCAGTGCATG  
CTTGGAGGAATGCTCTAACTGGAGCACCTTGAATCTCACGCCAGAACAAGTGGTCGCTATCGC  
CTCCCATGATGGTGGAAAACAAGCACTAGAAACTGTCCAAAGATTATTGCCTGTTCTTTGTCAGG  
CACACGGACTTACCCACAACAAGTCGTTGCTATAGCCTCCCATGATGGAGGGAAGCAAGCGTT  
AGAAACAGTGCAGCGGCTACTCCCTGTATTATGCCAGGCTCATGGTCTAACTCCACAACAAGTGG  
TGGCTATAGCCTCACACGATGGTGGTAAACAGGCACTTGA AACCGTCCAAAGACTCCTGCCGGT  
CCTCTGCCAGGCACACGGCCTCACCCCGAACAAGTGGTGGCTATTGCTTCGCATGATGGAGGT  
AAGCAGGCTTTAGAGACAGTCCAGAGACTACTACCCGTTCTATGCCAGGCCCATGGTTTGACCCC  
GGAACAGGTTGTTGCTATTGCGTCAAATAAGGGCGGCAAGCAAGCGTTGGAAACCGTTCAAGCA  
TTACTCCCTGTTCTCTGTCAAGCACATGGGCTAACGCCCGAGCAGGTTGTTGCAATTGCATCACA  
TGATGGAGGAAAGCAGGCCTTAGAAACGGTACAGGCACCTTTACCAGTCCTTTGCCAAGCACAC  
GGGCTTACACCCGAACAAGTGGTCGCTATTGCAAGTAATATAGGTGGAAAACAAGCACTGGAAC  
CGTGCAGGCGCTTTTGGCGGTATTATGCCAAGCTCACGGCCTAACTCCTGAACAGGTGGTTGCG  
ATTGCCTCAAATGGTGGGGGTAACACAGGCACTGGAGACTGTGCAGCGGCTTTTGCCTGTTTTGT  
GTCAAGCTCATGATTGACACCAAGAGCAGTGGTGGTGCCTATAGCTAGTAACATTGGAGGTAACA  
GCGCTTGAACCGGTGCAACGTCTGCTGCCAGTTCTATGTCAAGCTCATGGGTTGACCCCAACA  
GGTTGTAGCGATCGCTTCCAATAAAGGAGGAAAGCAAGCTCTAGAAACGGTGCAGAGGCTCCTC  
CCGTTCTTTGTCAGGCGCATGGATTGACCCCGGAGCAGGTGGTCGCAATCGCCAGTCATGATG  
GAGGTAAGCAGGCCTTGGAAACCGTTGAGGCGTTACTCCCGGTTCTATGCCAGGCGCATGGCCT  
GACCCCTGAACAGGTTGTGGCGATAGCCAGTAACGGCGGGGAAAGCAGGCACTTGA AACCGT  
ACAACGACTCCTCCAGTCCTTTGTCAAGCCACGGATTGACTCCAGAACAAGTAGTTGCTATAG  
CTTCGAATAAGGGAGGAAAGCAGGCCCCTTGAACAGTTGAGCGTCTTTTGCAGTGTGTGTCAA  
GCACACGGATTGACTCCTGAACAGGTTGTGCGCCATTGCATCTAATATCGGTGGTAAGCAAGCTCT  
CGAAACCGTACAGCGACTCTTGCTGTTCTATGCCAAGCGCATGGCTTGACGCCGGAACAGGTG  
GTAGCCATAGCAAGCAACATAGGTGGCAAACAAGCTCTTGAACAGTTCAAAGGTTGTTACCTGT  
GCTTTGCCAAGCCCACGGTTTGACCCCTCAACAGGTGGTTGCTATAGCATCACATGATGGGGGA  
CGGCTGCTCTTGAGACAGTGCAGCGCCTGTTGCCCGTGTGTGTCAAGCGCATGGCTTAACAC  
CGGAACAGGTCGTGGCAATTGCGTCAAATATTGGCGGCAACAAGCGCTGGAAACCGTTGACCG  
ACTCTTGCTGTTCTGTGCCAAGCTCACGGTCTGACGCCCAACAGGTTGTTGCCATTGCTTCAA  
ATGGAGGAGGGAGGCCAGCCCTTGAGTCGATTGTGCGACAGCTATCTCGGCCCGACCCTGCTTT  
AGCCGCTCTGACAAATGATCATCTTGTGGCTCTCGCCTGCTTAGGAGGTCGCCAGCTTTAGACG  
CAGTAAAAAAGGGTCTACCTCATGCTCCGGCCTTAATCAAGAGGACGAATCGTAGAATCCAGAA  
CGAACGAGCCATCGCGTAGCCGATCACGCTCAAGTTGTTAGGGTTTTAGGTTTTTTTCAAGTGTCA  
TTCACATCCGGCACAAGCTTTGATGATGCCATGACCCAGTTTGGTATGTCAAGGCATGGATTAC  
TGCAACTTTTTCAGAAGAGTAGGAGTGACAGAGCTCGAAGCCAGAAGCGGAACTCTGCCACCCGC  
TAGCCAAAGATGGGATAGGATATTGCAGGCGAGTGGAAATGAAGCGCGCGAAACCATCTCCAACA  
AGCACTCAAACCCCGGATCAAGCGAGTTTGCACGCTTTTCGAGATTCTCTCGAAGCAGATTTGGA  
TGCCCTTCTCCAATGCACGAAGGTGATCAAACACTAGGCGAGTAGCAGGAAGAGGTCTAGGAGT  
GATCGTGAGTTACGGGCCCTCAGCACAACTGCTTTTGGAGTCAAGGTTGCCAGAAACAAGGG  
ACGCTTTACATCTCCATTGCTTTGGCGTGTAAAAAGGCCGCGAACTAGTATTGGAGGGGGATTA  
CCGGACCCAGGGACCCCACTGCTGCTGATCTAGCTGCTTCTAGTACGGTAATGCGCGAGCAAG  
ACGAGGATCCATTTGCTGGGGCAGCTGATGACTTCCCGCATTCAACGAAGAAGAATTAGCATG  
GTTGATGGAGTTACTGCCACAGTAAGCGCTTACTAGCTTTTAAGCCAGCCCCGACACCCGCCAAC  
ACCCGCTGACGCGCCCTGACGGGC



HrpB2<sub>1-40/Δ2-10</sub>-dTALE-2ΔN

TGCCGCAGCTGGCACGACAGGTTTCCCGACTGGAAAGCGGGCAGTGAGCGCAACGCAATTAAT  
GTGAGTTAGCTCACTCATTAGGCACCCAGGCTTTACACTTTATGCTTCCGGCTCGTATGTTGTGT  
GGAATTGTGAGCGGATAACAATTGCAATAAGGATTTTTTAAATGGCCGGCACCAGTGCTGCCGCG  
ACCCAAGCGCTGTCGCCGGTGGCAACGCCCAACCAAGCGCTGGTGAATCGCTTTCAAGCGCTGA  
TGCAATCAGCGGGCAGCTTCTCTGACCTCCTGAGACAGTTTATCCCTCTTTGTTCAACACCTCA  
CTGTTTGACTCACTTCCGCCTTTTGGGGCTCACCATACTGAAGCCGCTACTGGTGAAGTGGGATGA  
GGTGCAGTCAGGCTTAAGAGCAGCTGATGCCCCACCACCTACGATGAGGGTGGCAGTAACTGCT  
GCTAGGCCACCGAGAGCTAAACCAGCTCCAAGACGCAGAGCAGCACAACCTTCCGATGCATCTC  
CTGCTGCTCAAGTCGATCTTCGCACTTTAGGGTATAGCCAGCAACAACAGGAGAAGATCAAACCT  
AAGGTCCGAAGTACAGTTGCGCAACACCATGAAGCCCTTGTGGTTCATGGGTTCACTCATGCCCA  
CATAGTTGCACTATCCCAACATCCTGCTGCTCTTGGAACTGTTGCGGTGAAGTACCAGGACATGA  
TTGCTGCTTTACCTGAAGCAACACACGAGGCAATAGTCGGTGTGGCAAACAGTGGTCTGGCGC  
TAGGGCTCTAGAAGCCCTCCTTACAGTTGCAGGAGAATTGCGGGGACCTCCCTTGCAGCTCGAT  
ACCGGACAATTGCTGAAGATTGCCAAACGTGGTGGTGTACGGCAGTAGAAGCAGTGCATGCTT  
GGAGGAATGCTCTAACTGGAGCACCTTGAATCTCACGCCAGAACAAGTGGTCGCTATCGCCTC  
CCATGATGGTGGAAAACAAGCACTAGAACTGTCCAAAGATTATTGCCTGTTCTTTGTCAGGCAC  
ACGGACTTACCCACAACAAGTCGTTGCTATAGCCTCCCATGATGGAGGGAAGCAAGCGTTAGA  
AACAGTGCAGCGGCTACTCCCTGTATTATGCCAGGCTCATGGTCTAACTCCACAACAAGTGGTGG  
CTATAGCCTCACACGATGGTGGTAAACAGGCACCTTGAACCGTCCAAAGACTCCTGCCGGTCCCTC  
TGCCAGGCACACGGCCTCACCCCGAACAAGTGGTGGCTATTGCTTCGCATGATGGAGGTAAGC  
AGGCTTTAGAGACAGTCCAGAGACTACTACCGTTCATGCCAGGCCCATGGTTTGACCCCGGA  
ACAGGTTGTTGCTATTGCGTCAAATAAGGGCGGCAAGCAAGCGTTGGAAACCGTTCAAGCATTAC  
TCCCTGTTCTGTCAAGCACATGGGCTAACGCCCGAGCAGGTTGTTGCAATTGCATCACATGAT  
GGAGGAAAGCAGGCCTTAGAAACGGTACAGGCACTTTTACCAGTCTTTGCCAAGCACACGGGC  
TTACACCCGAACAAGTGGTCGCTATTGCAAGTAATATAGGTGGAAAACAAGCACTGGAAACCGTG  
CAGGCGCTTTTGCCGGTATTATGCCAAGCTCACGGCCTAACTCCTGAACAGGTGGTTGCGATTG  
CCTCAAATGGTGGGGTAAACAGGCAGTGGAGACTGTGCAGCGGCTTTTGCCTGTTTTGTGTCA  
AGCTCATGATTGACACCAGCAGGTGCTGCTATAGCTAGTAACATTGGAGTAAACAAGCG  
CTTGAACCGTGCACAGTCTGCTGCCAGTTCTATGTCAAGCTCATGGTTGACCCACAACAGGT  
TGTAGCGATCGCTTCCAATAAAGGAGGAAAGCAAGCTCTAGAAACGGTGCAGAGGCTCCTCCCG  
GTTCTTTGTCAGGCGCATGGATTGACCCCGGAGCAGGTGGTTCGCAATGCCAGTCATGATGGAG  
GTAAGCAGGCCTTGGAAACCGTTCAGGCGTTACTCCCGTTCATGCCAGGCGCATGGCCTGAC  
CCCTGAACAGGTTGTGGCGATAGCCAGTAACGGCGGGGGAAAGCAGGCACCTTGAACCGTACAA  
CGACTCCTCCAGTCTTTGTCAAGCCCACGGATTGACTCCAGAACAAGTAGTTGCTATAGCTTC  
GAATAAGGGAGGAAAGCAGGCCCTTGAACAGTTCAGCGTCTTTTGCCAGTGTGTGTCAAGCAC  
ACGGATTGACTCCTGAACAGGTTGTCGCCATTGCATCTAATATCGGTGGTAAGCAAGCTCTCGAA  
ACCGTACAGCGACTCTTGCTGTTCTATGCCAAGCGCATGGCTTGACGCCGGAACAGGTGGTAG  
CCATAGCAAGCAACATAGGTGGCAAACAAGCTCTTGAACAGTTCAAAGGTTGTTACCTGTGCTT  
TGCCAAGCCCACGGTTTGACCCCTCAACAGGTGGTTGCTATAGCATCACATGATGGGGGACGGC  
CTGCTCTTGAGACAGTGCAGCGCCTGTTGCCCGTGTGTGTCAAGCGCATGGCTTAACACCGGA  
ACAGGTGCTGGCAATTGCGTCAAATATTGGCGGCAAACAAGCGCTGGAAACCGTTACAGCGACTC  
TTGCCTGTTCTGTGCCAAGCTCACGGTCTGACGCCCCAACAGGTTGTTGCCATTGCTTCAAATGG  
AGGAGGGAGGCCAGCCCTTGAGTCGATTGTCGCACAGCTATCTCGGCCCGACCCTGCTTTAGCC  
GCTCTGACAAATGATCATCTTGTGGCTCTCGCTGCTTAGGAGGTCGCCAGCTTTAGACGCAGT  
AAAAAAGGGTCTACCTCATGCTCCGGCCTTAATCAAGAGGACGAATCGTAGAATCCCAGAACGAA  
CGAGCCATCGCGTAGCCGATCACGCTCAAGTTGTTAGGGTTTTAGGTTTTTTTCAAGTGTCAATCAC  
ATCCGGCACAAGCTTTTCGATGATGCCATGACCCAGTTTGGTATGTCAAGGCATGGATTACTGCAA  
CTTTTCAGAAGAGTAGGAGTGACAGAGCTCGAAGCCAGAAGCGGAACTCTGCCACCCGCTAGCC  
AAAGATGGGATAGGATATTGCAGGCGAGTGAATGAAGCGCGCGAAACCATCTCCAACAAGCAC  
TCAAACCCCGGATCAAGCGAGTTTGCACGCTTTTCGAGATTCTCTCGAACGAGATTTGGATGCC  
CTTCTCCAATGCACGAAGGTGATCAAACACTAGGCGAGTAGCAGGAAGGTTAGGAGTATGATCG  
TGCAAGTACGGGCCCCCAGCACAACAGTCTTTTGGAGTCAAGGTTGCCAGAACAAGGGGACGCT  
TTACATCTCCCATTTGCTTGGCGTGTAAAAAGGCCGCGAACTAGTATTGGAGGGGGATTACCGGA  
CCAGGGACCCCCACTGCTGCTGATCTAGCTGCTTCTAGTACGGTAATGCGCGAGCAAGACGAG  
GATCCATTTGCTGGGGCAGCTGATGACTTCCCCGCATTCAACGAAGAAGAATTAGCATGGTTGAT  
GGAGTTACTGCCACAGTAAAGCGCTTACTAGCTTTTAAAGCCAGCCCCGACACCCGCCAACACCCG  
CTGACGCGCCCTGACGGGC
